# Supplementary material for: First Responders to Hyperosmotic Stress in Murine Astrocytes: Connexin 43 Gap Junctions Are Subject to an Immediate Ultrastructural Reorganization
Source: MDPI journal article supplement (doi:10.3390/biology10121307), 2021-12-09
Supplement: s1 [file s1]

Figure 2

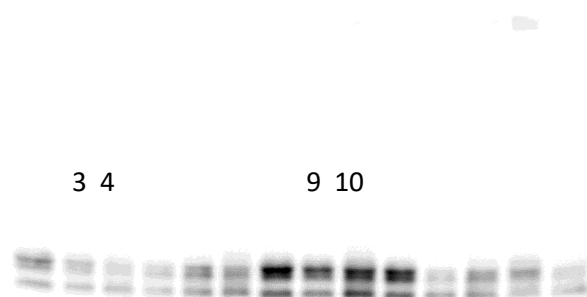

Cx43, shown are lanes 3 and 4, lanes 9 and 10 were used for quantification

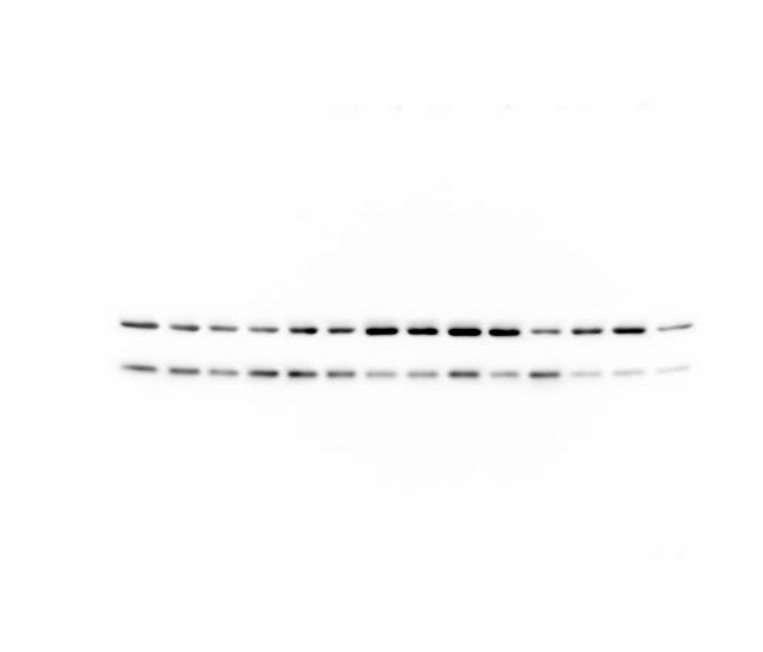

GAPDH (lower signal) for Cx43

Figure 4

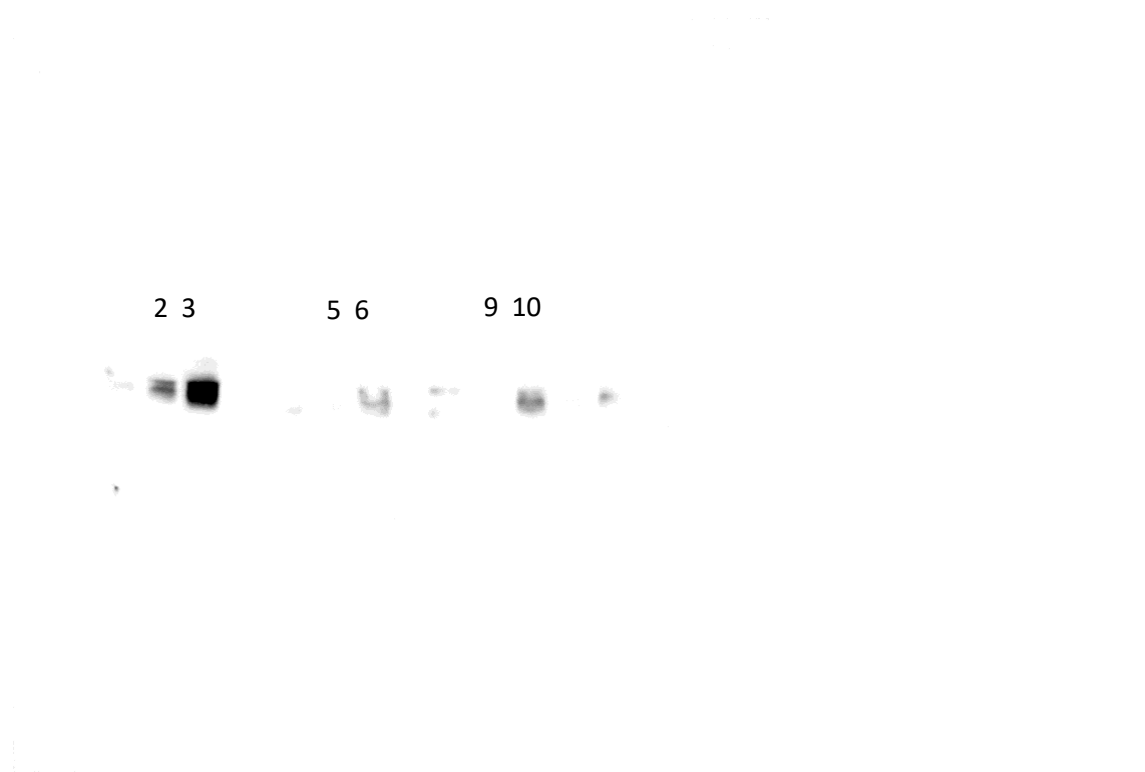

PhosphoCx43-S368, shown are lanes 2 and 3, lanes 5 and 6 and 9 and 10 were used for further quantification

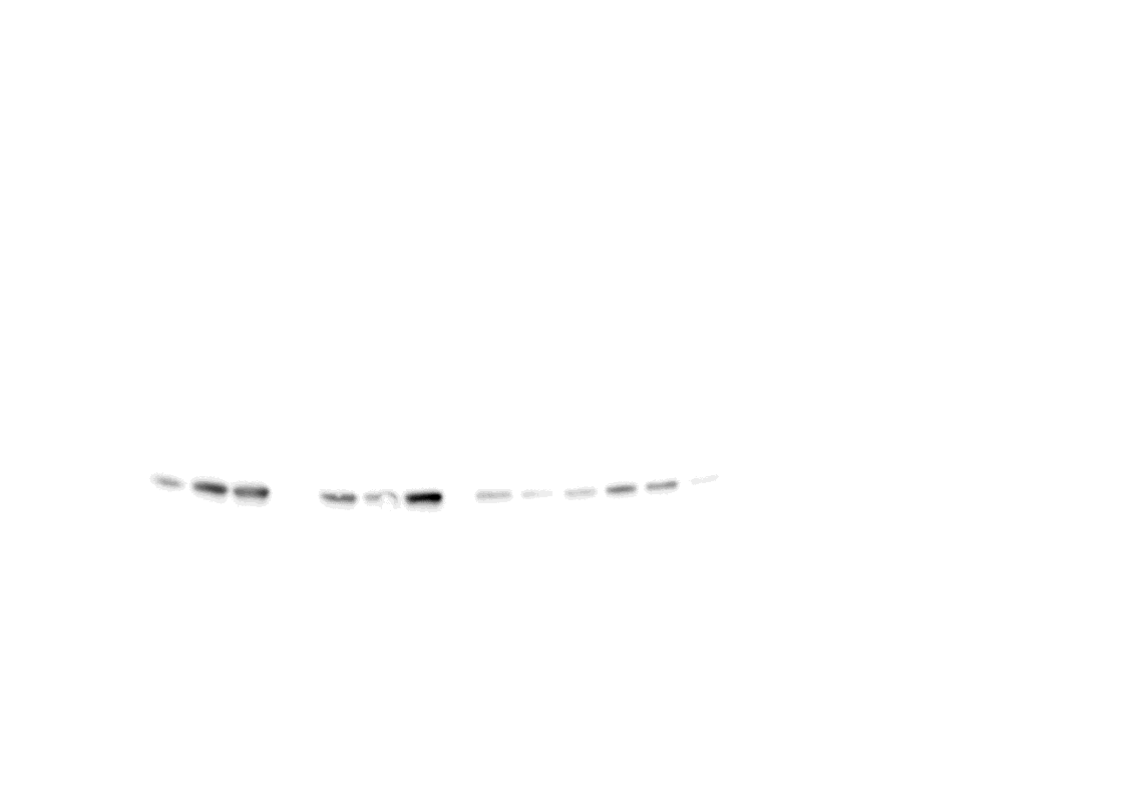

GAPDH for PhosphoCx43-S368

Figure 5

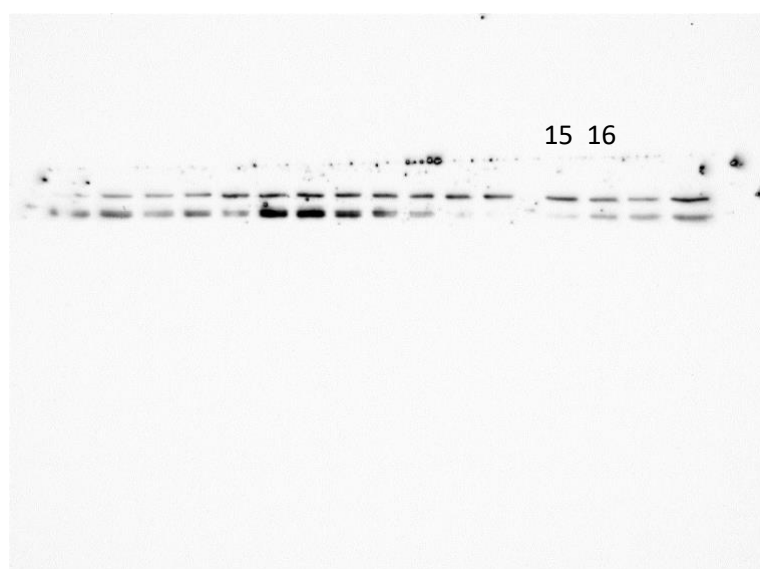

ZO-1 (upper signal), shown are lanes 15 and 16

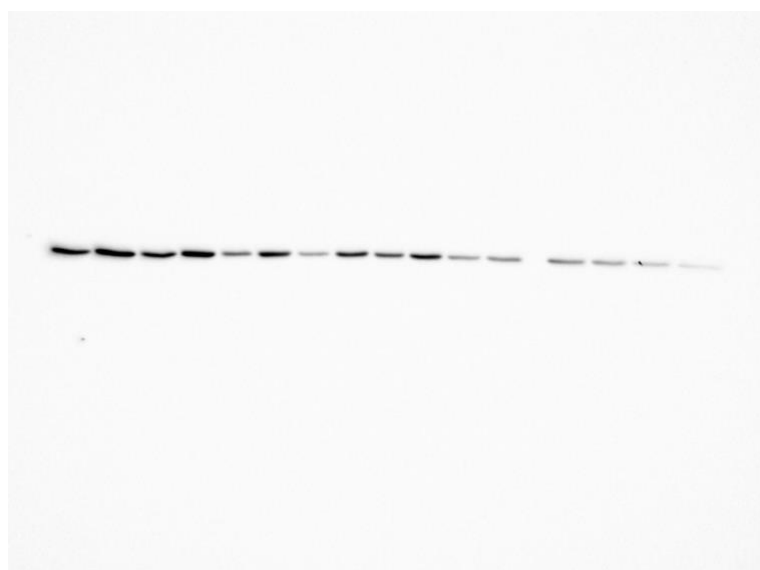

GAPDH for ZO-1
